# Supplementary material for: General practice perspective on the use of telehealth during the COVID-19 pandemic in Australia using an Action Research approach: a qualitative study
Source: HighWire-hosted journal article supplement (doi:10.1136/bmjopen-2022-063179), 2022-10-01
Supplement: bmjopen-2022-063179supp001_data_supplement.pdf [file bmjopen-2022-063179supp001_data_supplement.pdf]

Supplementary Table 1. Qualitative analysis of Action Research: definitions and coding framework.

| Theme                                                                                                                                                                                                           | Context/<br>Perspective            | Subtheme                                    | Subtheme definition                                                                                                                                                               |
|-----------------------------------------------------------------------------------------------------------------------------------------------------------------------------------------------------------------|------------------------------------|---------------------------------------------|-----------------------------------------------------------------------------------------------------------------------------------------------------------------------------------|
| <b>1. Evolution of telehealth</b><br><br><i>Changes to the model of telehealth care as a result of the COVID-19 pandemic in Australia (including descriptions of telehealth pre and post pandemic)</i>          | patients, providers, and practices | N/A                                         | N/A                                                                                                                                                                               |
| <b>2. Barriers to telehealth</b><br><br><i>Barriers are factors that act as obstacles which either prevent, discourage, or do not facilitate the uptake or use of telehealth in a general practice setting.</i> | patients                           | 2.1 Residential aged care facility barriers | Barriers to telehealth use specific to residential aged care settings.                                                                                                            |
|                                                                                                                                                                                                                 | providers                          |                                             |                                                                                                                                                                                   |
|                                                                                                                                                                                                                 | patients                           | 2.2 Privacy barriers                        | Barriers to accessing telehealth which pertain to concerns or hesitancy about privacy, including sharing or storage of sensitive information or the inability to seclude oneself. |
|                                                                                                                                                                                                                 | providers                          |                                             |                                                                                                                                                                                   |
|                                                                                                                                                                                                                 | patients                           | 2.3 Eligibility barriers                    | Barriers to telehealth related to government requirements and regulations, including patient status and MBS billing rules.                                                        |
|                                                                                                                                                                                                                 | providers                          |                                             |                                                                                                                                                                                   |

| Theme                                                                                                                                                                                                                                   | Context/<br>Perspective | Subtheme                                    | Subtheme definition                                                                                                                                                                                                                                                         |
|-----------------------------------------------------------------------------------------------------------------------------------------------------------------------------------------------------------------------------------------|-------------------------|---------------------------------------------|-----------------------------------------------------------------------------------------------------------------------------------------------------------------------------------------------------------------------------------------------------------------------------|
|                                                                                                                                                                                                                                         | patients                | 2.4 Technology barriers<br>(2.4.2 video)    | Barriers to accessing telehealth due to obstacles causing difficulty or lack of access to technology factors such as hardware, software, and internet access.                                                                                                               |
|                                                                                                                                                                                                                                         | providers               |                                             |                                                                                                                                                                                                                                                                             |
|                                                                                                                                                                                                                                         | providers               | 2.5 Quality of care barriers                | Factors that act as a barrier to telehealth based on potential difficulty performing usual face-to-face care such as requirement for test referral, physical examination, specialist referral, prescribing, etc.; presentations deemed unsuitable for “distance-mode” care. |
|                                                                                                                                                                                                                                         | patients                | 2.6 Sociodemographic barriers               | Barriers influenced by factors pertaining to a patient’s socioeconomic (economic, cultural, or regionality) or demographic (age, sex, etc.) status.                                                                                                                         |
| <b>3. Benefits of telehealth</b><br><br><i>Factors which encourage telehealth uptake or use, which provide advantages in a variety of settings and users (patients and providers), or which have a positive impact on patient care.</i> | patients                | 3.1 Residential aged care facility benefits | Advantages of telehealth specific to a residential aged care setting.                                                                                                                                                                                                       |
|                                                                                                                                                                                                                                         | providers               |                                             |                                                                                                                                                                                                                                                                             |
|                                                                                                                                                                                                                                         | providers               | 3.2 Practice benefits                       | Factors or examples of telehealth that are advantageous to the general practice setting, with a focus on benefit to the GP and practice.                                                                                                                                    |
|                                                                                                                                                                                                                                         | patients                | 3.3 Quality of care benefits                | Telehealth features that contribute to enhancement of quality of clinical care; presentations/clinical situations where telehealth would be advantageous over traditional                                                                                                   |

| Theme | Context/<br>Perspective | Subtheme                      | Subtheme definition                                                                                                                                                                      |
|-------|-------------------------|-------------------------------|------------------------------------------------------------------------------------------------------------------------------------------------------------------------------------------|
|       |                         |                               | face-to-face presentations                                                                                                                                                               |
|       | patients                | 3.4 Sociodemographic benefits | Advantages of telehealth for certain subsets of patients based on their socioeconomic (economic, cultural, or regionality) or demographic (age, sex, etc.) status, or disease diagnosis. |
