# Supplementary material for: General practice perspective on the use of telehealth during the COVID-19 pandemic in Australia using an Action Research approach: a qualitative study
Source: HighWire-hosted journal article supplement (doi:10.1136/bmjopen-2022-063179), 2022-10-01
Supplement: bmjopen-2022-063179supp002_data_supplement.pdf [file bmjopen-2022-063179supp002_data_supplement.pdf]

## Supplementary Information

Supplementary Box 1. Guiding questions for semi-structured focus group discussion.

|                                                                                                                                                                                            |
|--------------------------------------------------------------------------------------------------------------------------------------------------------------------------------------------|
| 1. Which types of patients or consults would be the best candidates to be offered a telehealth consult or not, and why?                                                                    |
| 2. What types of populations would benefit from continued access to telehealth beyond the COVID 19 pandemic? What are the potential reasons or explanations for your feelings around this? |
| 3. What do you perceive to be the barriers to telehealth uptake? What would you do to break down or reduce the impact of these barriers?                                                   |
| 4. What are your thoughts about tools for helping to share things that would normally be done visually face-to-face?                                                                       |
| 5. What were the primary medical issues or reasons when GPs used telehealth, specifically using video consultations, among aged care residents?                                            |
| 6. If something like a prescription or blood tests needs to be ordered, do you just do it the same way you would have if you were face to face with them?                                  |
